# Supplementary material for: Development of a cellulose-based 96-well plate vertical flow pull-down assay
Source: Royal Society of Chemistry journal article supplement (doi:10.1039/d3ay00614j), 2023-01-01
Supplement: d3ay00614j2.pdf [file d3ay00614j2.pdf]

1           **Development of a cellulose-based 96-well plate vertical flow pull-down assay**

2   **Hoi Lok Cheng<sup>a,\*</sup>, Huan Jia<sup>a,\*</sup>, Sing Mei Lim<sup>a</sup>, Say Yong Ng<sup>a</sup>, Patthara Kongsuphol<sup>a</sup>,**  
3                           **Megan E. McBee<sup>a</sup>, Hadley D. Sikes<sup>a,b,#</sup>**

4   <sup>a</sup> Antimicrobial Resistance Interdisciplinary Research Group (AMR-IRG), Singapore-MIT Alliance in Research  
5   and Technology (SMART), 1 CREATE Way, 138602

6   <sup>b</sup> Department of Chemical Engineering, Massachusetts Institute of Technology (MIT), 25 Ames Street, Building  
7   66, Cambridge, MA 02139, USA

8   \* H.L.C and H.J contributed equally to this work.

9   # Hadley D. Sikes is the corresponding author, Email: [sikes@mit.edu](mailto:sikes@mit.edu)

10

11

12

1 **Supplementary Information**

2

**A.**

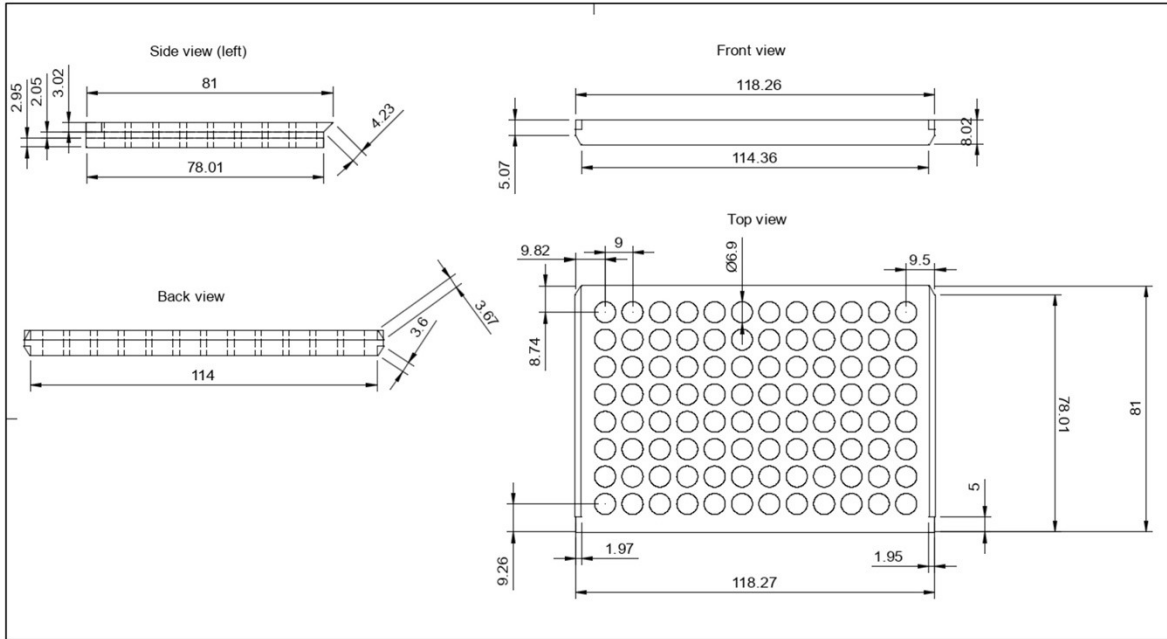

**B.**

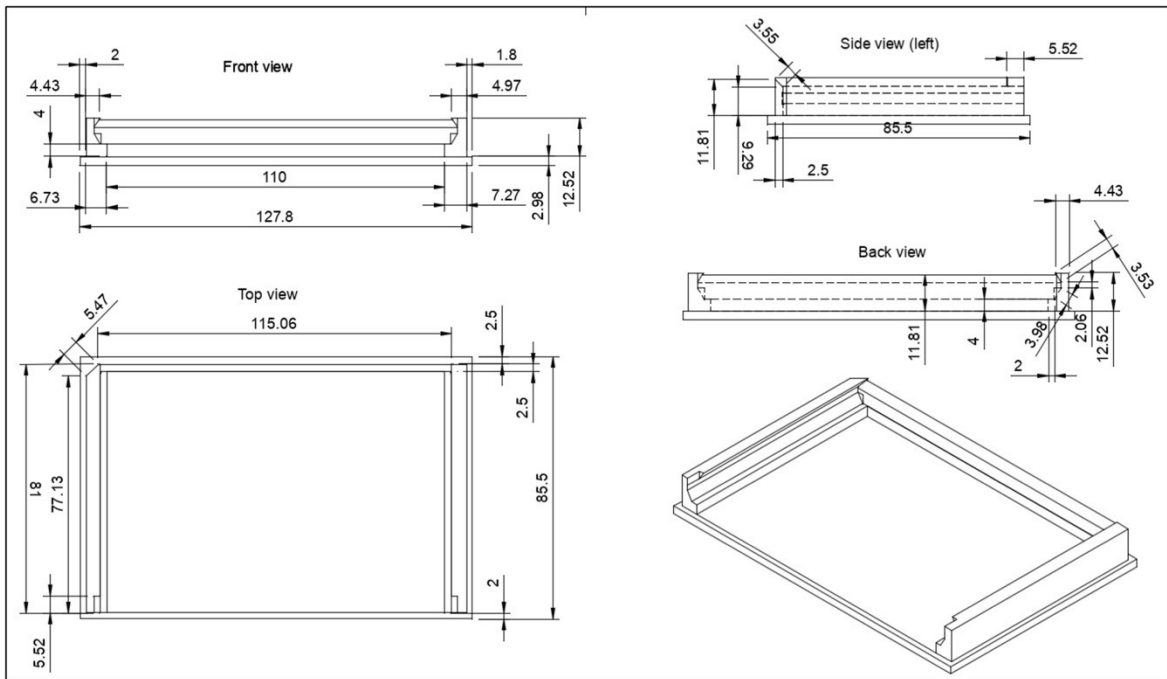

**Figure S1. 2D drawings of dimensions for plate housing.**

**(A)** Dimensions for the lid; and **(B)** Dimensions for the base.

3  
4  
5  
6  
7  
8  
9  
10  
11

| Layouts |  5 mm<br> 5 mm<br> 5 mm |  5 mm<br> 4 mm<br> 4 mm |  5 mm<br> 4 mm<br> 3 mm |  5 mm<br> 3 mm<br> 3 mm |                                                                                     |
|---------|----------------------------------------------------------------------------------------------------------------------------------------------------------------------------------------------------------------------------------------------------------------------------|----------------------------------------------------------------------------------------------------------------------------------------------------------------------------------------------------------------------------------------------------------------------------|----------------------------------------------------------------------------------------------------------------------------------------------------------------------------------------------------------------------------------------------------------------------------|----------------------------------------------------------------------------------------------------------------------------------------------------------------------------------------------------------------------------------------------------------------------------------|-------------------------------------------------------------------------------------|
|         | Test Results                                                                                                                                                                                                                                                               |                                                                                                                                                                                           |                                                                                                                                                                                           |                                                                                                                                                                                                |  |
| Type    | a                                                                                                                                                                                                                                                                          | b                                                                                                                                                                                                                                                                          | c                                                                                                                                                                                                                                                                          | d                                                                                                                                                                                                                                                                                |                                                                                     |

Figure S2. Optimization results for four types of flow pathway.

Table S1. Plate definition configurations and the readouts

| Conf. | Well | Plate Size |          |        |        |           |            | Plate Height |            |        |           | Fluorescence Readouts |         |
|-------|------|------------|----------|--------|--------|-----------|------------|--------------|------------|--------|-----------|-----------------------|---------|
|       |      | S/N        | Diameter | Length | Width  | Left well | Right well | Upper well   | Lower well | Height | Tolerance | Cover                 | Skirt h |
| 1     | 3500 | 127500     | 85000    | 14380  | 113380 | 11240     | 74240      | 17000        | 200        | 0      | 4500      | 441.7 ± 24.4          | 5.5%    |
| 2     | 3500 | 127500     | 85000    | 14380  | 113380 | 11740     | 74240      | 17000        | 200        | 0      | 4500      | 413.4 ± 35.9          | 8.7%    |
| 3     | 3500 | 127500     | 85000    | 14380  | 113380 | 12240     | 74240      | 17000        | 200        | 0      | 4500      | 387.5 ± 36.0          | 9.3%    |
| 4     | 3000 | 127500     | 85000    | 14380  | 113380 | 12240     | 74240      | 17000        | 200        | 0      | 4500      | 385.6 ± 35.6          | 9.2%    |
| 5     | 3000 | 127500     | 85000    | 15200  | 114000 | 11900     | 74500      | 17000        | 200        | 0      | 4500      | 278.0 ± 62.3          | 22.4%   |
| 6     | 3000 | 127500     | 85000    | 15200  | 114500 | 11900     | 74500      | 17000        | 200        | 0      | 4500      | 246.9 ± 48.0          | 19.5%   |
| 7     | 3000 | 127500     | 85000    | 15200  | 114300 | 11500     | 74500      | 17000        | 200        | 0      | 4500      | 281.6 ± 55.4          | 19.7%   |
| 8     | 3000 | 127500     | 85000    | 15200  | 114300 | 11900     | 74500      | 17000        | 200        | 0      | 4500      | 209.7 ± 13.7          | 6.5%    |

1

2 **Table S2. Raw fluorescence readouts for plates with high, mid and low signal samples**

| Fluorescence Readouts |      |      |      |      |      |      |      |      |      |      |      |      |
|-----------------------|------|------|------|------|------|------|------|------|------|------|------|------|
| High Signal Sample    | 2110 | 2709 | 2628 | 2501 | 2473 | 2277 | 2585 | 2333 | 2811 | 2615 | 2834 | 2671 |
|                       | 2024 | 2226 | 2544 | 2263 | 2703 | 2760 | 2413 | 2211 | 2421 | 2151 | 2343 | 2668 |
|                       | 2107 | 2479 | 2591 | 2520 | 2189 | 2603 | 2395 | 2228 | 2177 | 2314 | 2603 | 2636 |
|                       | 2646 | 2552 | 2583 | 2382 | 2237 | 2641 | 2586 | 2684 | 2654 | 2607 | 2434 | 2686 |
|                       | 2429 | 2560 | 2335 | 2645 | 2281 | 2892 | 2505 | 2263 | 2536 | 2473 | 2673 | 2415 |
|                       | 2367 | 2378 | 2720 | 2536 | 2481 | 2497 | 2286 | 2476 | 2333 | 2496 | 2487 | 2669 |
|                       | 2214 | 2472 | 2481 | 2532 | 2173 | 2359 | 2535 | 2494 | 2381 | 2546 | 2333 | 3027 |
|                       | 2721 | 2492 | 2599 | 2305 | 2152 | 1813 | 2246 | 2393 | 2075 | 2422 | 2170 | 2285 |
| Mid Signal Sample     | 1130 | 1170 | 1120 | 993  | 1230 | 1076 | 1067 | 1052 | 1183 | 1187 | 1116 | 1133 |
|                       | 1246 | 1261 | 1147 | 1176 | 1200 | 1115 | 1016 | 885  | 1127 | 1130 | 1161 | 1234 |
|                       | 1413 | 1392 | 1148 | 1271 | 1183 | 1248 | 1166 | 1076 | 1065 | 1313 | 1259 | 1217 |
|                       | 1371 | 1075 | 1251 | 1151 | 1237 | 1148 | 1254 | 1233 | 1161 | 1474 | 1332 | 1225 |
|                       | 1329 | 1254 | 1217 | 1282 | 1238 | 1413 | 1218 | 1056 | 1089 | 1217 | 1301 | 1432 |
|                       | 1385 | 1371 | 1226 | 1285 | 1249 | 1169 | 1218 | 1143 | 1063 | 1408 | 1356 | 1424 |
|                       | 1357 | 1283 | 1267 | 1232 | 1244 | 1371 | 1372 | 1283 | 1337 | 1378 | 1408 | 1385 |
|                       | 1446 | 1265 | 1414 | 1309 | 1184 | 1295 | 1137 | 1190 | 1088 | 1153 | 1277 | 1319 |
| Low Signal Sample     | 158  | 149  | 161  | 148  | 142  | 143  | 145  | 130  | 121  | 119  | 121  | 107  |
|                       | 143  | 141  | 145  | 141  | 141  | 135  | 133  | 130  | 131  | 122  | 133  | 123  |
|                       | 161  | 158  | 151  | 142  | 142  | 153  | 145  | 134  | 129  | 140  | 141  | 133  |
|                       | 130  | 121  | 123  | 120  | 128  | 114  | 124  | 114  | 116  | 112  | 114  | 99   |
|                       | 147  | 141  | 144  | 138  | 134  | 138  | 135  | 135  | 131  | 133  | 135  | 129  |
|                       | 142  | 141  | 148  | 142  | 135  | 140  | 134  | 126  | 142  | 133  | 122  | 126  |
|                       | 142  | 147  | 144  | 136  | 139  | 120  | 121  | 121  | 129  | 132  | 133  | 141  |
|                       | 140  | 138  | 143  | 137  | 130  | 102  | 131  | 125  | 138  | 133  | 139  | 141  |

3

4

5

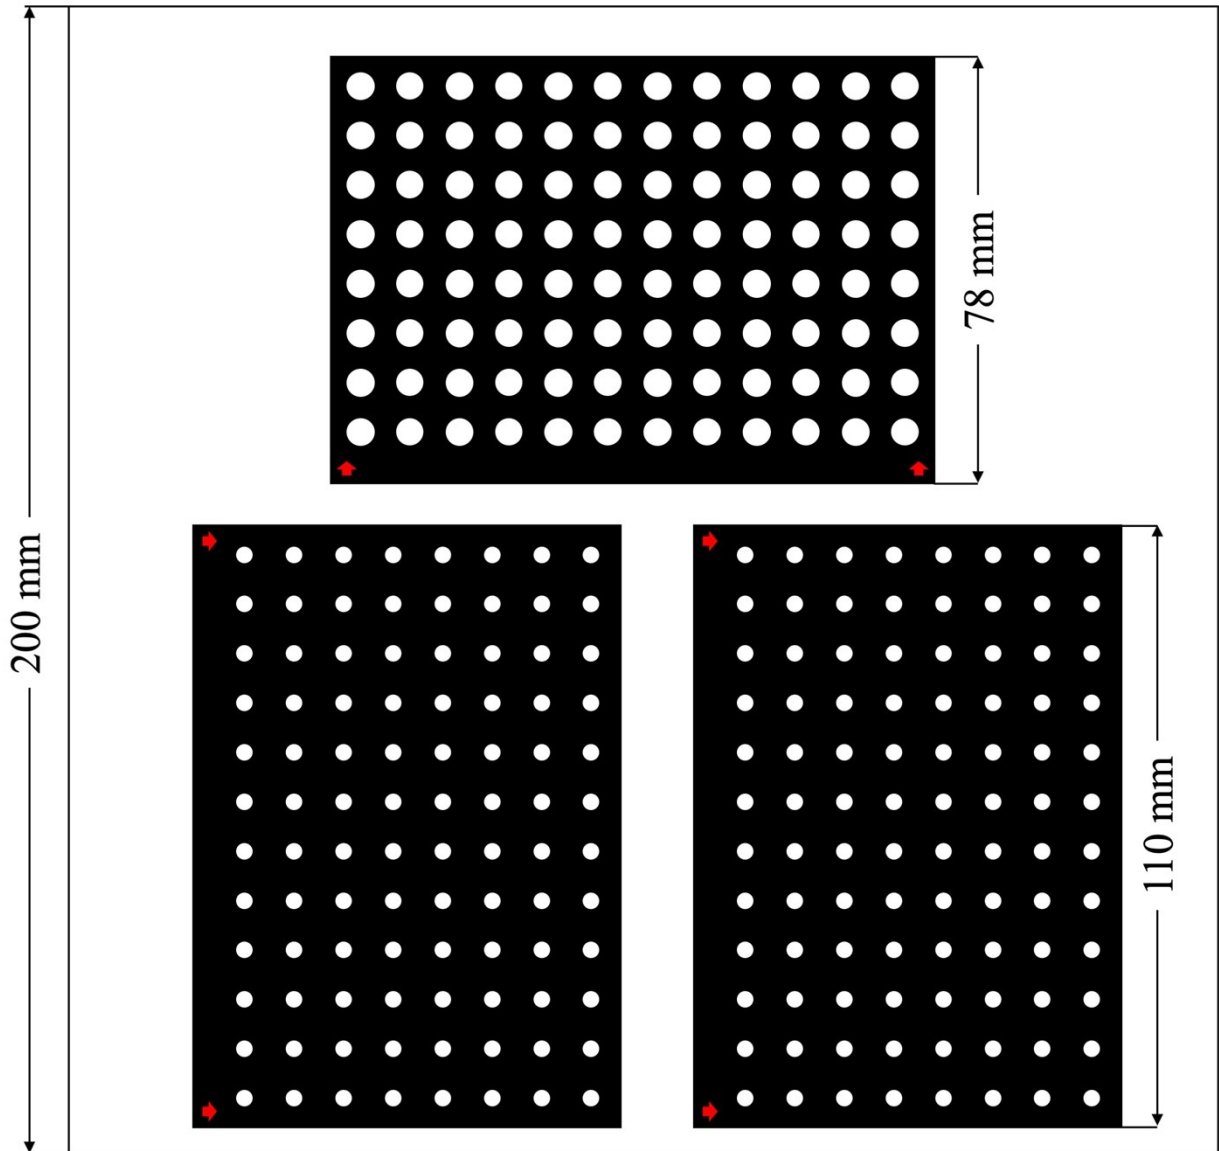

1  
2 **Figure S3. Sample of wax print layout for three layers of cellulose test papers.**

3  
4  
5  
6  
7  
8  
9  
10  
11  
12  
13  
14  
15  
16  
17

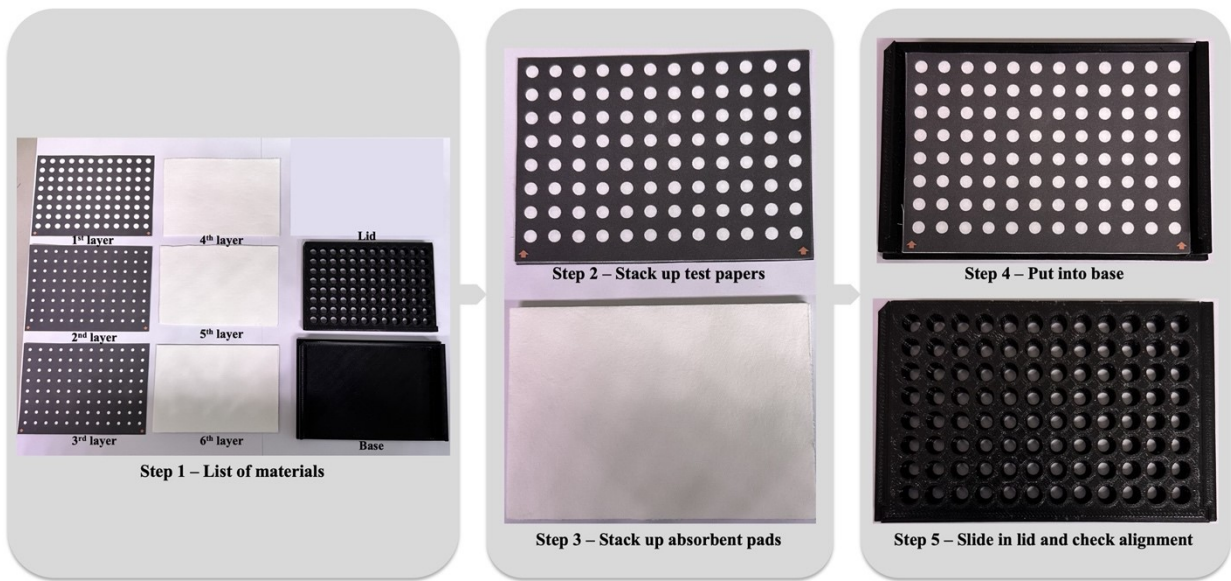

1  
2  
3  
4  
5

**Figure S4. Demonstration of assembling a cellulose-based 96-well plate.**

**Sup. Video 1. Video illustration for assembling cellulose-based 96-well plate.**
